# Supplementary material for: Effects of surfactant head group modification on vertically oriented mesoporous silica produced by the electrochemically assisted surfactant assembly method
Source: Royal Society of Chemistry journal article supplement (doi:10.1039/d3na00031a), 2023-01-01
Supplement: d3na00031a1.pdf [file d3na00031a1.pdf]

## Supplementary information: Effects of surfactant head group modification on vertically oriented mesoporous silica produced by the electrochemically assisted surfactant assembly method

Nabil A. N. Mohamed,<sup>a</sup> Sarah Harcourt-Vernon,<sup>b</sup> Yisong Han,<sup>b</sup> Andrew L. Hector,<sup>a\*</sup> Anthony R. Houghton,<sup>c</sup> Gillian Reid,<sup>a</sup> Daryl R. Williams<sup>c</sup> and Wenjian Zhang<sup>a</sup>

<sup>a</sup> School of Chemistry, University of Southampton, Highfield, Southampton SO17 1BJ, UK

<sup>b</sup> Department of Physics, University of Warwick, Coventry CV4 7AL, UK

<sup>c</sup> Department of Chemical Engineering, Imperial College London SW7 2AZ, UK

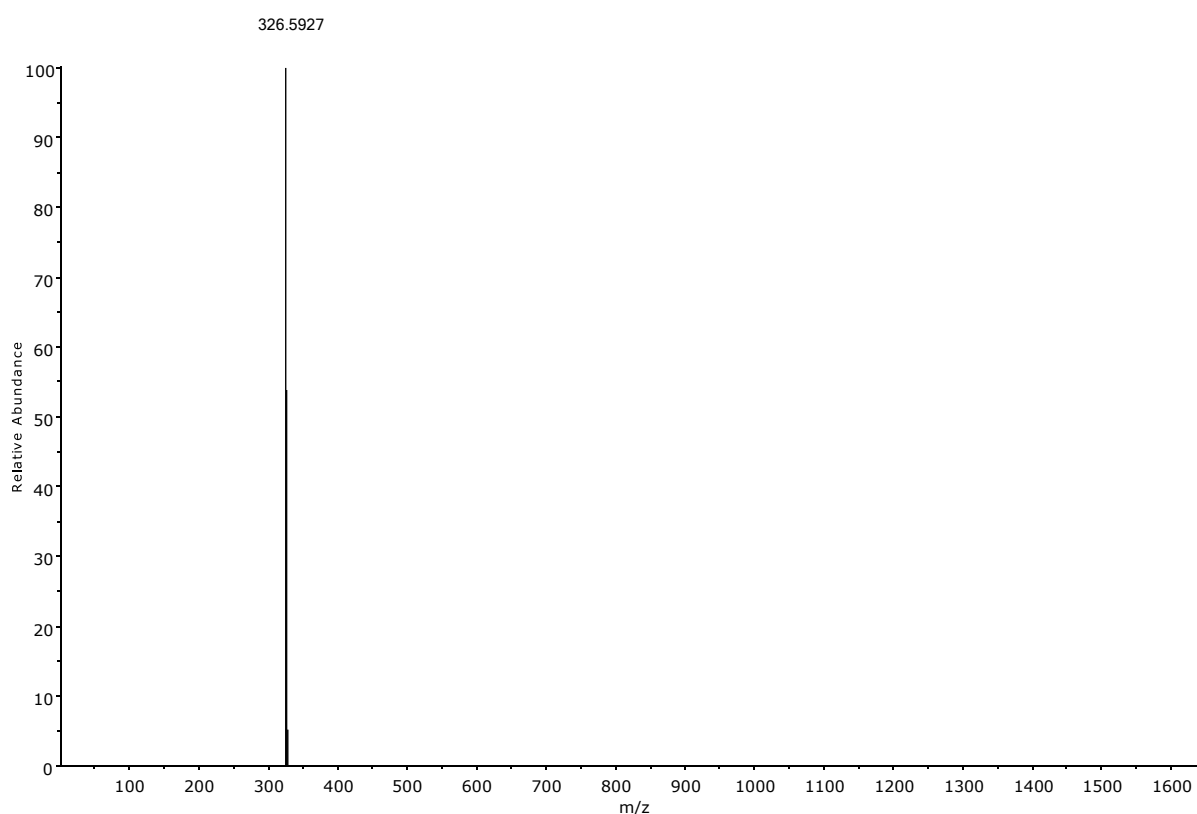

**Figure S1.** Positive ion electrospray mass spectrum of C<sub>18</sub>DMEAB in methanol at 25 °C.

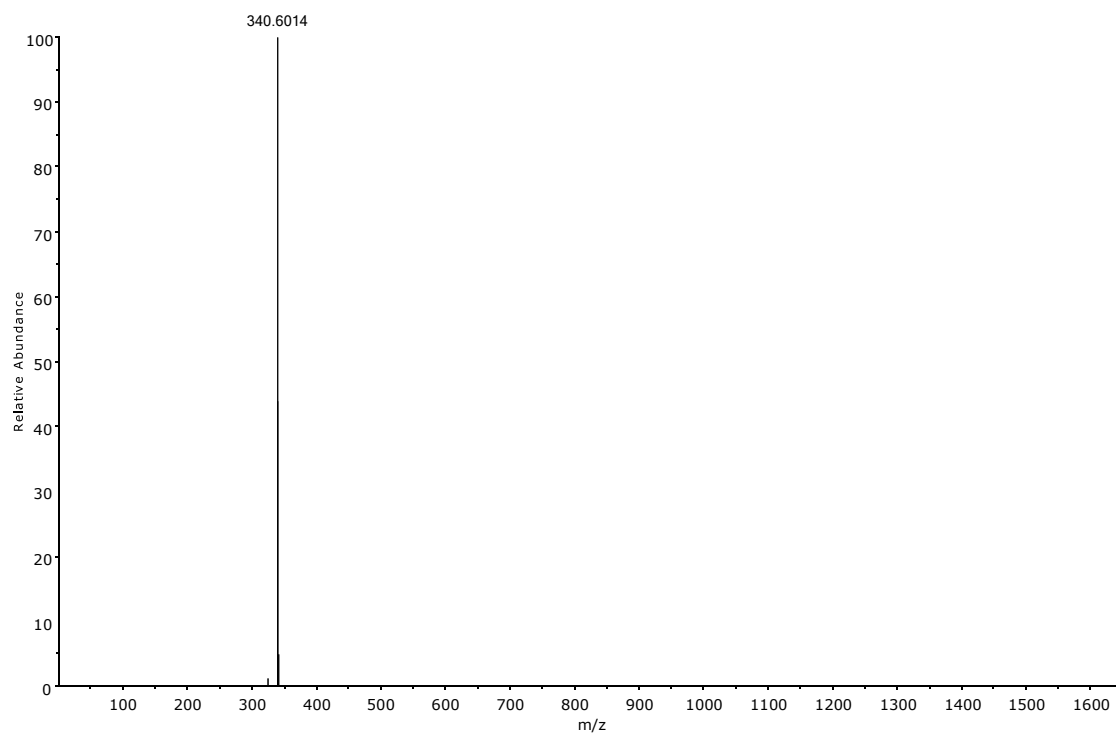

**Figure S2.** Positive ion electrospray mass spectrum of C<sub>18</sub>DEMAB in methanol at 25 °C.

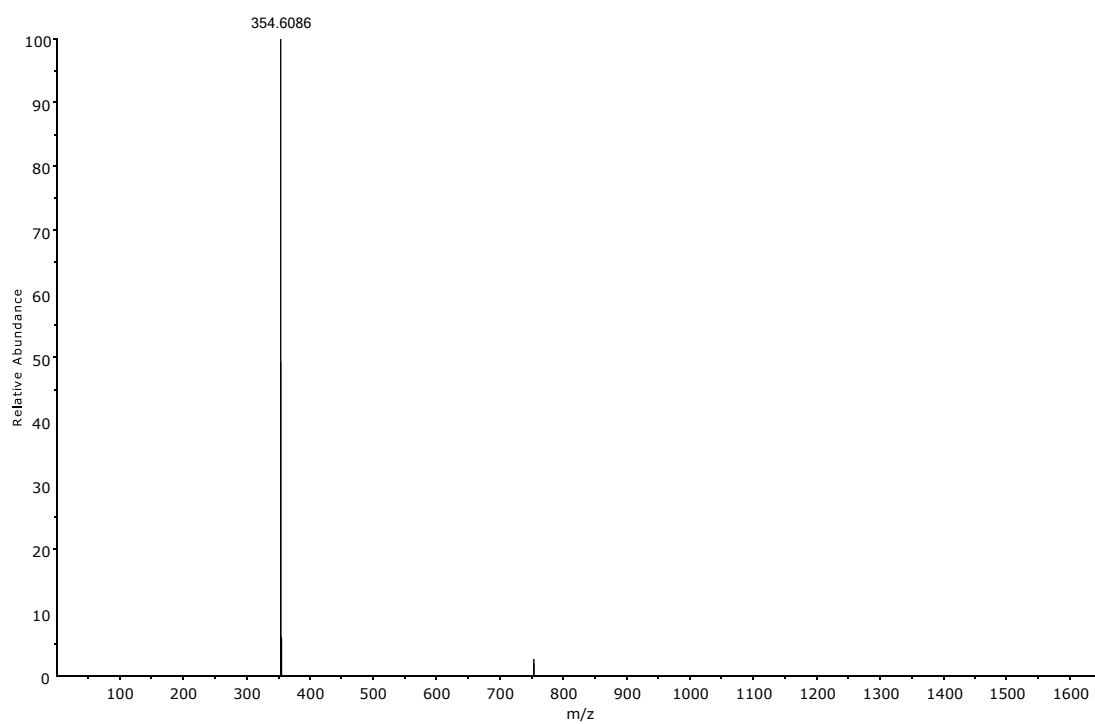

**Figure S3.** Positive ion electrospray mass spectrum of C<sub>18</sub>TEAB in methanol at 25 °C.

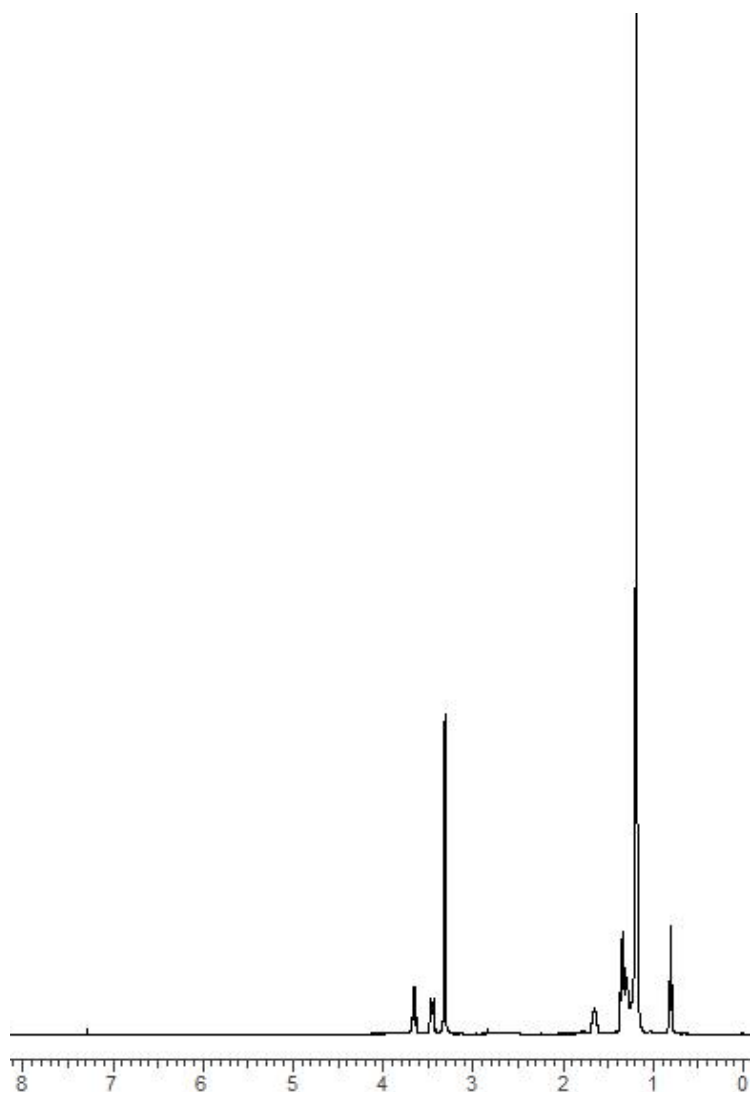

**Figure S4.**  $^1\text{H}$  NMR spectrum of  $\text{C}_{18}\text{DMEAB}$  in  $\text{CDCl}_3$  at  $25\text{ }^\circ\text{C}$ .

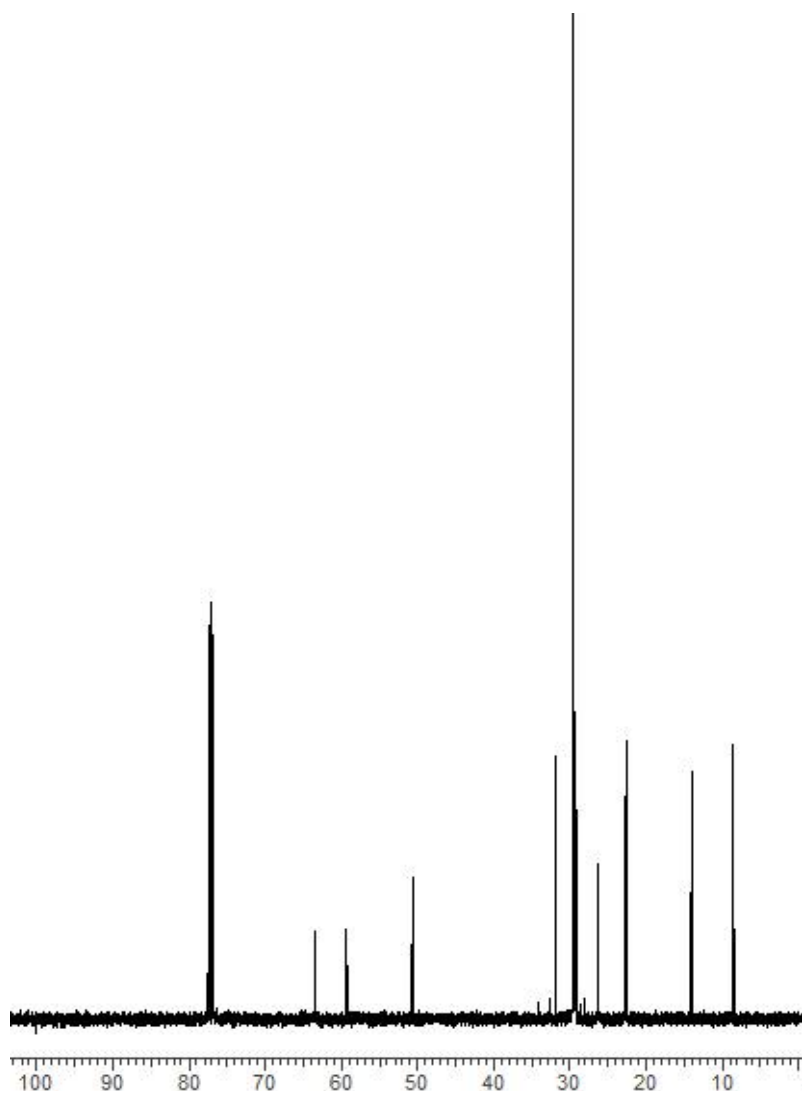

**Figure S5.**  $^{13}\text{C}\{^1\text{H}\}$  NMR spectrum of  $\text{C}_{18}\text{DMEAB}$  in  $\text{CDCl}_3$  ( $77.16\text{ ppm}$ ) at  $25\text{ }^\circ\text{C}$ .

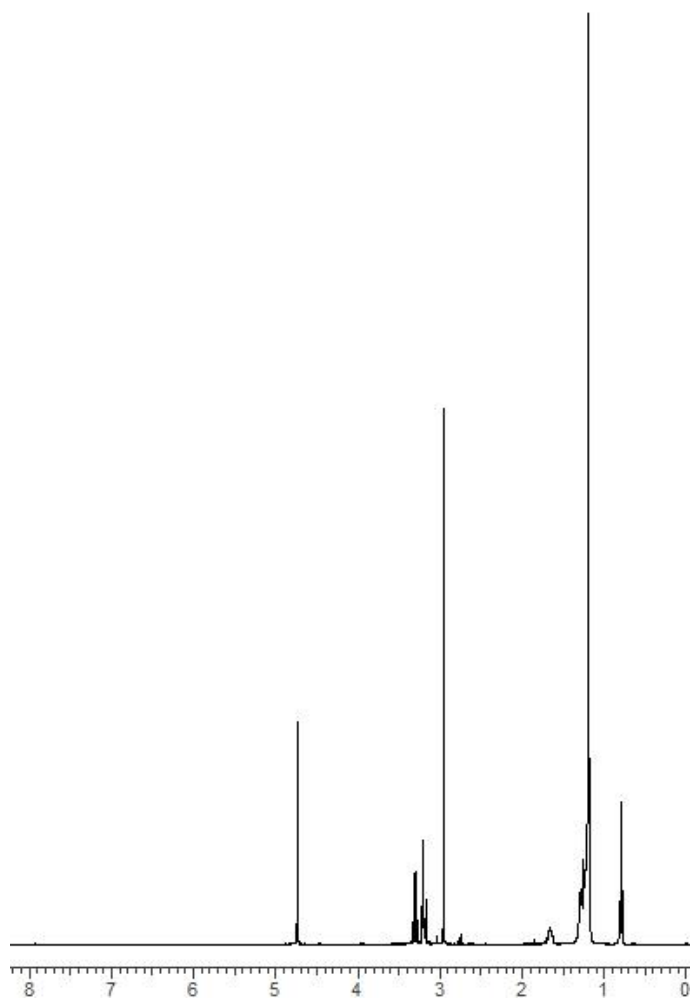

**Figure S6.**  $^1\text{H}$  NMR spectrum of  $\text{C}_{18}\text{DEMAB}$  in  $\text{D}$ -methanol at  $25\text{ }^\circ\text{C}$ .

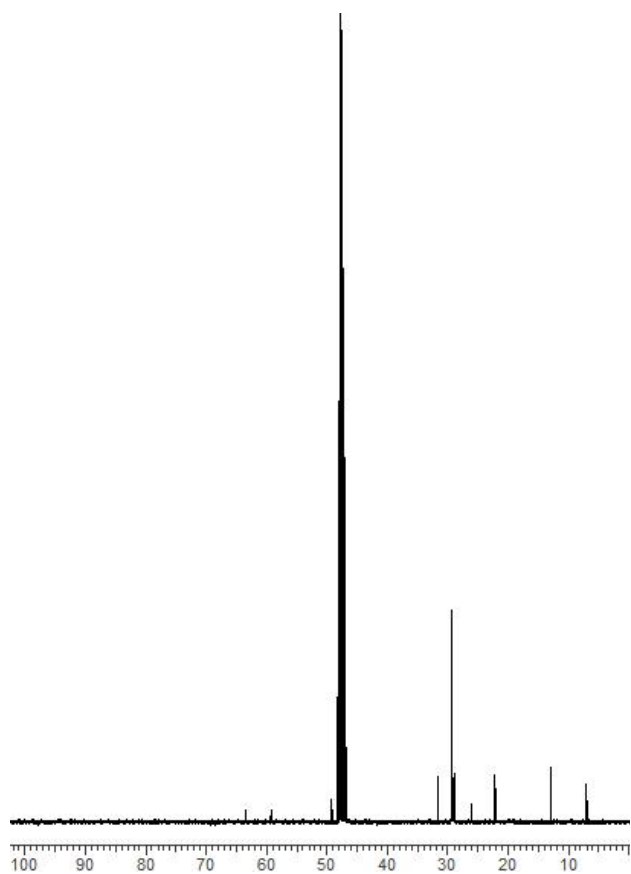

**Figure S7.**  $^{13}\text{C}\{^1\text{H}\}$  NMR spectrum of  $\text{C}_{18}\text{DEMAB}$  in D-methanol at 25 °C.

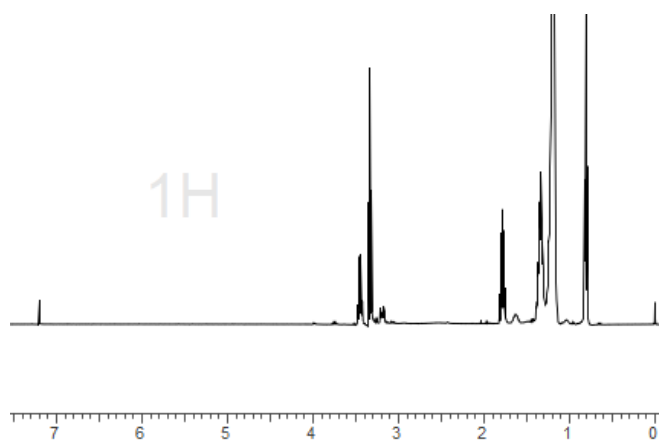

**Figure S8.**  $^1\text{H}$  NMR spectrum of  $\text{C}_{18}\text{TEAB}$  in  $\text{CDCl}_3$  at 25 °C.

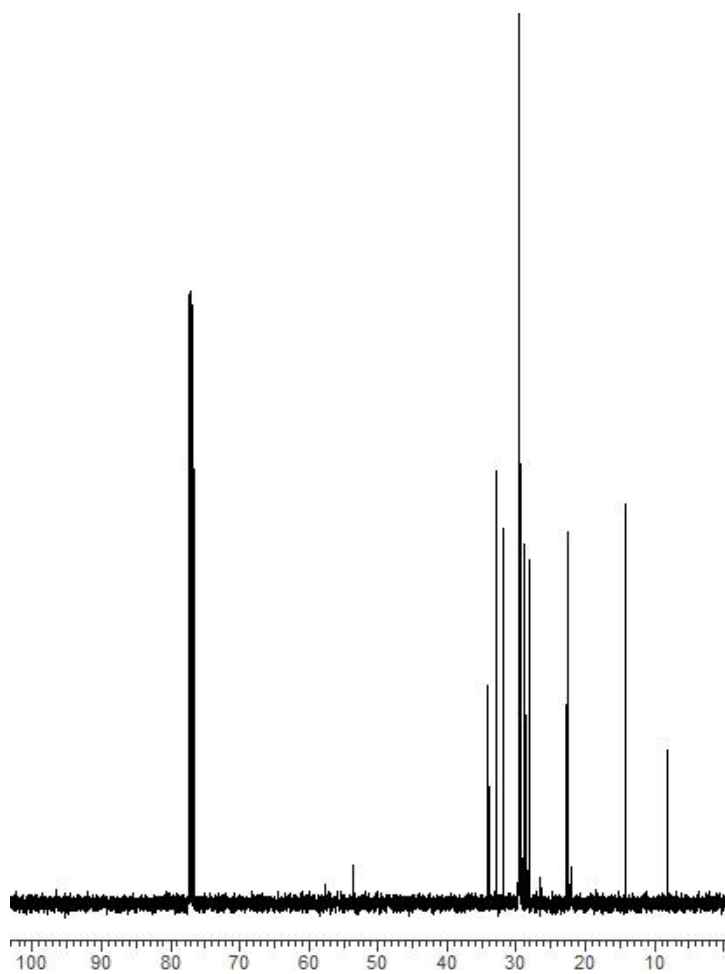

**Figure S9.**  $^{13}\text{C}\{^1\text{H}\}$  NMR of  $\text{C}_{18}\text{TEAB}$  in  $\text{CDCl}_3$  (77.16 ppm) at 25 °C.

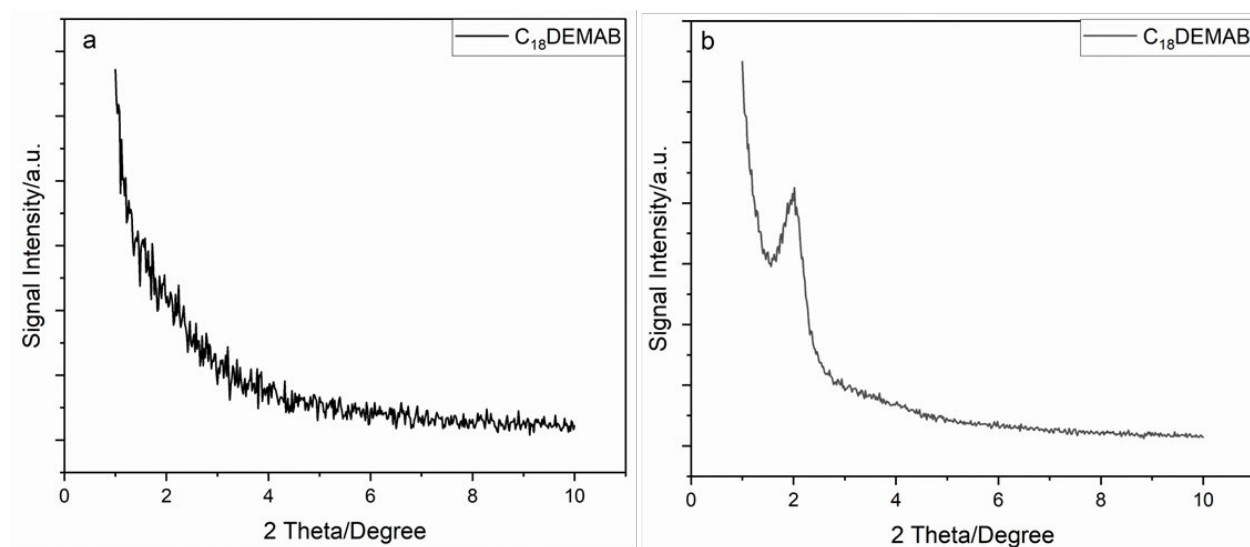

**Figure S10** 1D in-plane GISAXS patterns of EASA films produced with  $\text{C}_{18}\text{DEMAB}$  (a) before (b) after surfactant removal. The film was deposited at a potential of -1.25 V (vs.  $\text{Ag}/\text{Ag}^+$ ) for 20 seconds on ITO electrodes.

**Table S1.** The electrochemical data of a range of mesoporous silica films collected from CV's

| Surfactants/Electrode | Redox Probe                        | $I_{pa}$ (mV)         | $I_{pc}$ (mV)          | $\Delta E_p$ (mV) |
|-----------------------|------------------------------------|-----------------------|------------------------|-------------------|
| Bare ITO              | $[\text{Fe}(\text{CN})_6]^{3-/4-}$ | $2.02 \times 10^{-2}$ | $-2.03 \times 10^{-2}$ | 90                |
| C <sub>18</sub> TAB   | $[\text{Fe}(\text{CN})_6]^{3-/4-}$ | $1.35 \times 10^{-2}$ | $-1.26 \times 10^{-2}$ | 148               |
| C <sub>18</sub> DMEAB | $[\text{Fe}(\text{CN})_6]^{3-/4-}$ | $1.58 \times 10^{-3}$ | $-3.01 \times 10^{-3}$ | 104               |
| C <sub>18</sub> DEMAB | $[\text{Fe}(\text{CN})_6]^{3-/4-}$ | N/A                   | N/A                    | N/A               |
| C <sub>18</sub> TEAB  | $[\text{Fe}(\text{CN})_6]^{3-/4-}$ | N/A                   | N/A                    | N/A               |
|                       |                                    |                       |                        |                   |
